# Supplementary material
Source: PubMed Central journal article supplement (PMC1913748)
Supplement: plntcell_tpc.107.051441_1.pdf [file plntcell_tpc.107.051441_1.pdf]

**A**

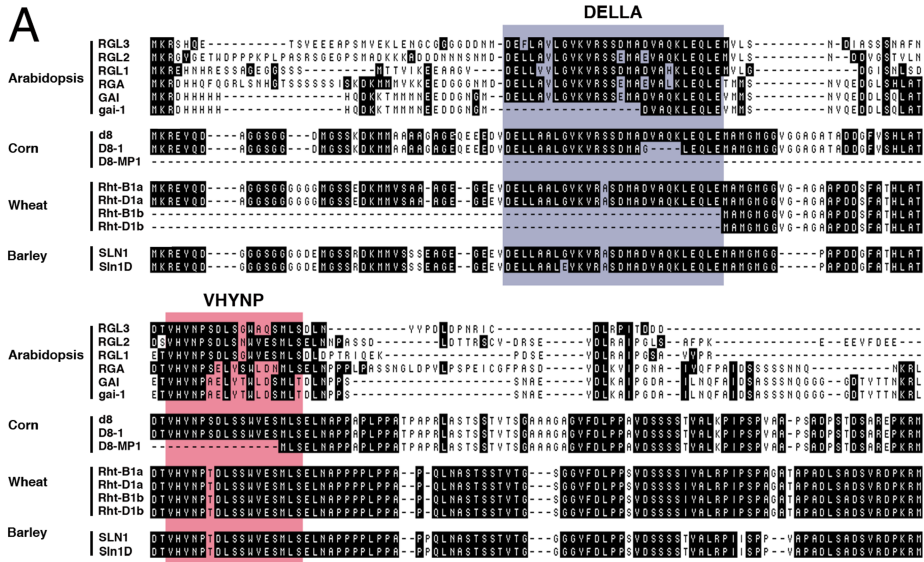

**B**

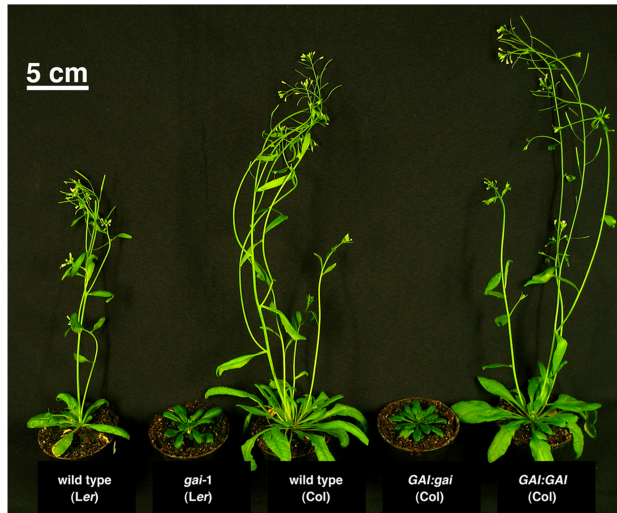

**Supplemental Figure 1.** (A) Clustal alignment of the 140 N-terminal amino acid residues of Arabidopsis GAI with its orthologues from maize, wheat and barley. The amino acid sequences of the previously reported gain-of-function dwarfing alleles are shown below the respective wild type sequences. This alignment served as a basis for the design of the *gai* mutant variants examined in this manuscript (Figures 1 and 5). The highly conserved DELLA and VHYNP domains are boxed. (B) Transgenic GAI:*gai* plants mimic the phenotype of the *gai-1* gain-of-function mutant. Four-week old wild type (ecotypes Columbia, Col, and Landsberg erecta, Ler), *gai-1* mutant as well as GAI:*gai* and GAI:GAI transgenic plants are shown. Transgenic plants expressing the stabilized *gai* protein from the GAI:*gai* transgene (see Figure 1) are phenotypically indistinguishable from the *gai-1* mutant whereas plants expressing the wild type GA responsive GAI protein from the GAI:GAI transgene are phenotypically wild type.
