# Supplementary material
Source: PubMed Central journal article supplement (PMC1913748)
Supplement: plntcell_tpc.107.051441_2.pdf [file plntcell_tpc.107.051441_2.pdf]

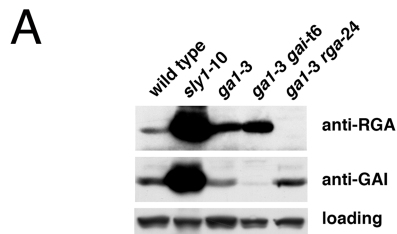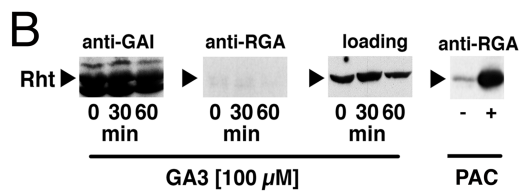

**Supplemental Figure 2.** Anti-GAI and anti-RGA antibodies specifically recognize the respective DELLA protein. (A) Anti-peptide antibodies recognize GAI and RGA proteins specifically in the degradation mutant *sly1-10* and the GA biosynthesis mutant *ga1-3* but not in the respective mutant controls. (B) Stabilized *gai* mutant variants have reduced RGA protein levels, as exemplified here with the GAI:Rht transgenic line (see Figure 1b). RGA protein becomes readily detectable when GA biosynthesis is blocked with the GA biosynthesis inhibitor paclobutrazol (PAC). The blot on the right with the PAC treatment was exposed longer than that shown on the left.
