# Supplementary material
Source: PubMed Central journal article supplement (PMC1913748)
Supplement: plntcell_tpc.107.051441_3.pdf [file plntcell_tpc.107.051441_3.pdf]

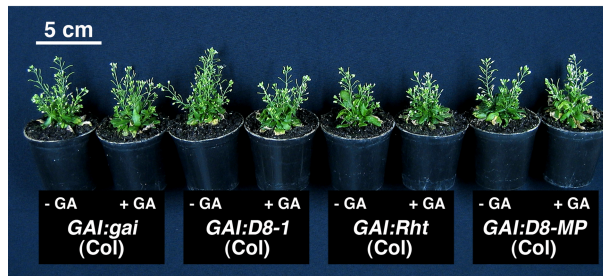

**Supplemental Figure 3.** Mutants expressing stabilized GAI variants are GA-insensitive. Shown are six week-old Arabidopsis plants expressing stabilized gai mutant variants as indicated in the panel. Their growth cannot be normalized by GA application (100  $\mu$ M GA3 sprayed twice per week). Compare also with Supplemental Figure S4 to judge the efficiency of the treatment.
