# Supplementary material
Source: PubMed Central journal article supplement (PMC1913748)
Supplement: plntcell_tpc.107.051441_4.pdf [file plntcell_tpc.107.051441_4.pdf]

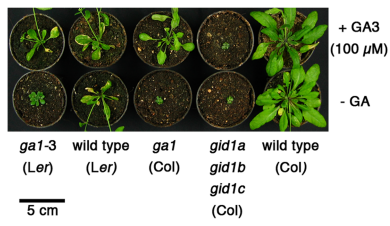

**Supplemental Figure 4.** The growth of *ga1* GA biosynthesis mutants but not that of the *gid1* triple mutants can be normalized by GA treatment. Shown are four week old *Arabidopsis ga1* mutant plants (*ga1-3*, ecotype Landsberg *erecta*; a new *ga1* allele, SALK\_109115, ecotype Columbia) as well as the *gid1* triple mutant (right panel) together with the respective Landsberg *erecta* (Ler) and Columbia (Col) wild type controls. Plants in the upper row were treated with GA (100  $\mu$ M GA3 sprayed twice per week), plants in the lower row are untreated.
