# Supplementary material
Source: PubMed Central journal article supplement (PMC1913748)
Supplement: plntcell_tpc.107.051441_5.pdf [file plntcell_tpc.107.051441_5.pdf]

| AGI Code  | Protein function                                           | Fold Repression in <i>qa1</i> | <i>qa1</i> | t-test p-value ( <i>qa1</i> ) | <i>qa1</i> + GA | t-test p-value ( <i>qa1</i> + GA) | p-value (ANOVA) | Fold Repression of <i>aid1a-c</i> | <i>aid1a-c</i> | t-test p-value ( <i>aid1a-c</i> ) | <i>aid1a-c</i> + GA3 | t-test p-value ( <i>aid1a-c</i> + GA3) |
|-----------|------------------------------------------------------------|-------------------------------|------------|-------------------------------|-----------------|-----------------------------------|-----------------|-----------------------------------|----------------|-----------------------------------|----------------------|----------------------------------------|
| AT1G15550 | gibberellin 3-beta-dioxygenase                             | 17.51                         | 691.20     | 0.64                          | 39.48           | 0.03                              | 0.01            | 1.02                              | 786.80         | 0.22                              | 774.50               | 0.53                                   |
| AT5G51810 | gibberellin 20-oxidase                                     | 15.45                         | 128.60     | 0.87                          | 6.32            | 0.87                              | 0.01            | 0.97                              | 143.40         | 0.36                              | 147.00               | 0.40                                   |
| AT1G50420 | scarecrow-like transcription factor 3                      | 11.36                         | 203.60     | 0.78                          | 17.63           | 0.03                              | 0.01            | 0.91                              | 219.00         | 0.54                              | 241.40               | 0.07                                   |
| AT2G45900 | expressed protein                                          | 6.36                          | 42.02      | 0.91                          | 6.61            | 0.03                              | 0.00            | 6.88                              | 43.49          | 0.92                              | 49.69                | 0.18                                   |
| AT3G63010 | GID1b                                                      | 6.25                          | 94.76      | 0.00                          | 15.15           | 0.63                              | 0.01            | 0.92                              | 12.05          | 0.56                              | 13.11                | 0.75                                   |
| AT5G07200 | gibberellin 20-oxidase                                     | 5.75                          | 37.73      | 0.19                          | 6.56            | 0.03                              | 0.00            | 1.05                              | 54.45          | 0.12                              | 51.72                | 0.13                                   |
| AT2G94240 | zinc finger family protein                                 | 5.45                          | 487.50     | 0.89                          | 89.42           | 0.02                              | 0.01            | 1.00                              | 493.20         | 0.94                              | 490.90               | 0.76                                   |
| AT1G25420 | gibberellin 20-oxidase                                     | 4.89                          | 28.55      | 0.43                          | 5.84            | 0.04                              | 0.01            | 0.94                              | 35.54          | 0.87                              | 36.51                | 0.32                                   |
| AT2G12290 | hypothetical protein                                       | 4.88                          | 160.70     | 0.26                          | 32.96           | 0.02                              | 0.02            | 0.95                              | 164.40         | 0.54                              | 172.60               | 0.42                                   |
| AT2G26710 | cytochrome P450, putative                                  | 4.49                          | 100.90     | 0.15                          | 22.48           | 0.02                              | 0.01            | 1.33                              | 118.10         | 0.02                              | 88.70                | 0.36                                   |
| AT2G31980 | cysteine proteinase inhibitor-related                      | 4.23                          | 360.80     | 0.81                          | 85.24           | 0.01                              | 0.01            | 1.06                              | 431.70         | 0.12                              | 408.10               | 0.54                                   |
| AT5G23190 | ethylene-responsive element-binding protein                | 4.09                          | 137.80     | 0.45                          | 33.70           | 0.01                              | 0.02            | 1.10                              | 133.30         | 0.20                              | 121.60               | 0.70                                   |
| AT2G31160 | expressed protein                                          | 4.03                          | 31.54      | 0.45                          | 7.83            | 0.03                              | 0.01            | 0.81                              | 35.02          | 0.89                              | 43.18                | 0.08                                   |
| AT4G39070 | zinc finger family protein                                 | 3.99                          | 99.60      | 0.64                          | 24.94           | 0.02                              | 0.01            | 1.05                              | 108.70         | 0.21                              | 103.80               | 0.75                                   |
| AT3G04070 | no apical meristem family protein                          | 3.89                          | 104.40     | 0.81                          | 26.83           | 0.02                              | 0.01            | 1.05                              | 115.70         | 0.35                              | 110.60               | 0.85                                   |
| AT5G47610 | zinc finger family protein                                 | 3.56                          | 79.06      | 0.06                          | 22.23           | 0.02                              | 0.01            | 1.02                              | 65.52          | 0.90                              | 64.15                | 0.77                                   |
| AT1G17830 | expressed protein                                          | 3.55                          | 39.03      | 0.40                          | 10.99           | 0.03                              | 0.01            | 0.87                              | 41.57          | 0.77                              | 47.85                | 0.28                                   |
| AT5G05120 | GID1a                                                      | 3.55                          | 217.20     | 0.01                          | 61.16           | 0.00                              | 0.01            | 1.25                              | 19.12          | 0.04                              | 15.30                | 0.02                                   |
| AT1G29270 | expressed protein                                          | 3.41                          | 102.20     | 0.41                          | 29.99           | 0.01                              | 0.04            | 1.08                              | 94.86          | 0.75                              | 87.77                | 0.63                                   |
| AT4G36110 | auxin-responsive protein                                   | 3.40                          | 40.27      | 0.81                          | 11.86           | 0.03                              | 0.02            | 1.30                              | 47.93          | 0.16                              | 36.84                | 0.36                                   |
| AT3G30180 | cytochrome P450                                            | 3.20                          | 189.10     | 0.95                          | 59.01           | 0.02                              | 0.02            | 1.20                              | 233.90         | 0.09                              | 195.40               | 0.95                                   |
| AT4G16447 | expressed protein                                          | 3.16                          | 102.00     | 0.69                          | 32.29           | 0.02                              | 0.01            | 0.73                              | 88.57          | 0.46                              | 120.70               | 0.06                                   |
| AT2G36060 | DNA-binding protein                                        | 3.12                          | 77.45      | 0.42                          | 24.79           | 0.02                              | 0.02            | 0.94                              | 81.33          | 0.49                              | 86.51                | 0.16                                   |
| AT1G58340 | MATE efflux protein-related                                | 2.98                          | 64.84      | 0.07                          | 21.73           | 0.02                              | 0.02            | 1.33                              | 66.27          | 0.09                              | 49.67                | 0.18                                   |
| AT2G39980 | transferase family protein                                 | 2.93                          | 123.60     | 0.49                          | 42.14           | 0.02                              | 0.02            | 1.32                              | 151.40         | 0.13                              | 114.30               | 0.76                                   |
| AT1G52250 | dynein light chain type 1 family protein                   | 2.93                          | 94.12      | 0.18                          | 33.83           | 0.02                              | 0.01            | 0.99                              | 80.64          | 0.65                              | 81.66                | 0.61                                   |
| AT5G40540 | protein kinase                                             | 2.78                          | 112.50     | 0.71                          | 40.50           | 0.01                              | 0.00            | 0.90                              | 119.20         | 0.46                              | 132.90               | 0.05                                   |
| AT2G28440 | expressed protein                                          | 2.78                          | 103.60     | 0.28                          | 37.41           | 0.03                              | 0.01            | 1.23                              | 28.41          | 0.53                              | 98.87                | 0.50                                   |
| AT5G28300 | trihelix DNA-binding protein                               | 2.73                          | 134.90     | 0.77                          | 10.4            | 0.01                              | 0.00            | 1.04                              | 144.30         | 0.35                              | 139.00               | 0.96                                   |
| AT2G45210 | auxin-responsive protein-related                           | 2.72                          | 122.80     | 0.86                          | 45.09           | 0.02                              | 0.01            | 1.26                              | 156.80         | 0.02                              | 124.40               | 0.67                                   |
| AT5G25210 | expressed protein                                          | 2.72                          | 44.49      | 0.18                          | 16.34           | 0.05                              | 0.03            | 1.12                              | 41.81          | 0.29                              | 37.20                | 0.77                                   |
| AT1G65910 | metal transporter                                          | 2.72                          | 126.60     | 0.10                          | 46.60           | 0.01                              | 0.01            | 0.92                              | 114.00         | 0.85                              | 124.30               | 0.37                                   |
| AT1G05980 | polygalacturonase, putative / pectinase                    | 2.71                          | 37.10      | 0.64                          | 14.04           | 0.04                              | 0.01            | 0.68                              | 35.68          | 0.91                              | 52.16                | 0.14                                   |
| AT4G04630 | expressed protein                                          | 2.63                          | 76.86      | 0.04                          | 29.21           | 0.02                              | 0.02            | 1.15                              | 71.47          | 0.33                              | 82.20                | 0.37                                   |
| AT2G01940 | zinc finger family protein                                 | 2.62                          | 18.73      | 0.70                          | 7.16            | 0.09                              | 0.01            | 0.88                              | 17.91          | 0.86                              | 20.42                | 0.47                                   |
| AT3G21420 | oxidoreductase, 2OG-Fe oxygenase family protein            | 2.55                          | 146.10     | 0.75                          | 57.21           | 0.01                              | 0.01            | 0.91                              | 153.70         | 0.78                              | 169.40               | 0.25                                   |
| AT4G23060 | calmodulin-binding family protein                          | 2.53                          | 141.60     | 0.60                          | 55.63           | 0.02                              | 0.02            | 1.04                              | 153.70         | 0.30                              | 147.60               | 0.15                                   |
| AT5G0290  | oxidoreductase, 2OG-Fe oxygenase family protein            | 2.51                          | 69.78      | 0.01                          | 27.62           | 0.03                              | 0.05            | 1.26                              | 61.31          | 0.23                              | 46.51                | 0.49                                   |
| AT1G30110 | diadenosine 5'-triphosphate triphosphate hydrolase         | 2.48                          | 152.50     | 0.28                          | 61.46           | 0.02                              | 0.02            | 0.87                              | 144.42         | 0.41                              | 149.50               | 0.44                                   |
| AT3G56400 | WRKY family transcription factor                           | 2.48                          | 63.70      | 0.22                          | 25.73           | 0.04                              | 0.03            | 1.74                              | 65.86          | 0.06                              | 37.92                | 0.17                                   |
| AT4G29190 | zinc finger family protein                                 | 2.47                          | 114.90     | 0.29                          | 46.55           | 0.02                              | 0.02            | 1.24                              | 123.10         | 0.15                              | 99.63                | 0.51                                   |
| AT5G07010 | sulfotransferase family protein                            | 2.41                          | 35.94      | 0.40                          | 14.92           | 0.04                              | 0.01            | 1.19                              | 44.80          | 0.36                              | 37.54                | 0.57                                   |
| AT5G65040 | senescence-associated protein-related                      | 2.38                          | 185.50     | 0.05                          | 77.87           | 0.01                              | 0.02            | 1.02                              | 186.60         | 0.35                              | 182.90               | 0.76                                   |
| AT2G45000 | cyclin family protein                                      | 2.37                          | 31.57      | 0.89                          | 13.30           | 0.04                              | 0.01            | 0.77                              | 31.47          | 0.87                              | 41.51                | 0.07                                   |
| AT1G20190 | expansin, putative                                         | 2.36                          | 45.66      | 0.73                          | 19.38           | 0.03                              | 0.00            | 0.80                              | 44.43          | 0.84                              | 55.83                | 0.06                                   |
| AT1G28360 | ERF domain protein 12                                      | 2.35                          | 13.29      | 0.96                          | 5.65            | 0.14                              | 0.00            | 0.82                              | 12.80          | 0.68                              | 15.68                | 0.56                                   |
| AT4G39510 | cytochrome P450 family protein                             | 2.34                          | 89.67      | 0.57                          | 38.26           | 0.01                              | 0.05            | 0.97                              | 109.10         | 0.38                              | 112.50               | 0.41                                   |
| AT1G31320 | LOB domain protein 4 / lateral organ boundaries domain pro | 2.32                          | 51.33      | 0.17                          | 22.08           | 0.03                              | 0.04            | 1.23                              | 52.42          | 0.37                              | 42.51                | 0.29                                   |
| AT5G15570 | phototropin-responsive NPH3 family protein                 | 2.27                          | 62.70      | 0.78                          | 27.62           | 0.02                              | 0.07            | 0.87                              | 69.00          | 0.73                              | 79.70                | 0.04                                   |
| AT5G67480 | TAZ zinc finger family protein / BTB/POZ domain-containing | 2.26                          | 564.60     | 0.81                          | 250.30          | 0.01                              | 0.00            | 1.04                              | 600.50         | 0.37                              | 575.30               | 0.99                                   |
| AT5G19340 | expressed protein                                          | 2.25                          | 97.86      | 0.29                          | 43.41           | 0.02                              | 0.02            | 1.19                              | 104.60         | 0.15                              | 87.54                | 0.37                                   |
| AT2G39705 | expressed protein                                          | 2.25                          | 73.70      | 0.37                          | 32.77           | 0.03                              | 0.07            | 0.97                              | 71.12          | 0.38                              | 72.97                | 0.67                                   |
| AT5G03670 | expressed protein                                          | 2.18                          | 37.95      | 0.83                          | 17.38           | 0.03                              | 0.02            | 0.90                              | 46.29          | 0.26                              | 51.27                | 0.04                                   |
| AT1G33790 | jascafin lectin family protein                             | 2.16                          | 290.80     | 0.91                          | 134.80          | 0.02                              | 0.03            | 1.11                              | 345.30         | 0.04                              | 310.30               | 0.63                                   |
| AT4G32800 | AP2 domain-containing transcription factor TINY            | 2.14                          | 32.90      | 0.15                          | 15.38           | 0.07                              | 0.02            | 1.13                              | 30.76          | 0.38                              | 27.11                | 0.91                                   |
| AT4G23200 | protein kinase family protein                              | 2.14                          | 30.94      | 0.70                          | 14.47           | 0.06                              | 0.04            | 1.30                              | 39.09          | 0.04                              | 30.12                | 0.90                                   |
| AT3G02910 | expressed protein                                          | 2.13                          | 515.30     | 0.54                          | 241.80          | 0.02                              | 0.03            | 1.16                              | 581.50         | 0.11                              | 501.20               | 0.65                                   |
| AT2G40435 | expressed protein                                          | 2.13                          | 23.43      | 0.65                          | 11.00           | 0.09                              | 0.04            | 0.77                              | 20.04          | 0.58                              | 26.00                | 0.25                                   |
| AT5G17760 | AxA-type ATPase family protein                             | 2.13                          | 78.75      | 0.65                          | 36.99           | 0.02                              | 0.01            | 1.06                              | 98.28          | 0.05                              | 92.84                | 0.33                                   |
| AT4G24210 | F-box family protein / SLEEPY1 protein                     | 2.13                          | 236.60     | 0.47                          | 111.30          | 0.01                              | 0.02            | 0.88                              | 216.80         | 0.44                              | 245.70               | 0.47                                   |
| AT4G27300 | S-locus protein kinase, putative                           | 2.12                          | 221.10     | 0.53                          | 104.30          | 0.01                              | 0.01            | 1.11                              | 268.60         | 0.34                              | 242.70               | 0.64                                   |
| AT1G46264 | heat shock transcription factor family protein             | 2.12                          | 81.36      | 0.22                          | 38.46           | 0.02                              | 0.02            | 0.82                              | 70.24          | 0.58                              | 85.24                | 0.22                                   |
| AT4G36410 | ubiquitin-conjugating enzyme 17                            | 2.10                          | 168.10     | 0.08                          | 79.93           | 0.02                              | 0.02            | 1.63                              | 172.30         | 0.04                              | 105.80               | 0.11                                   |
| AT1G52770 | phototropin-responsive NPH3 family protein                 | 2.10                          | 19.87      | 0.18                          | 9.48            | 0.02                              | 0.01            | 0.81                              | 16.12          | 0.62                              | 19.99                | 0.34                                   |
| AT5G46050 | proton-dependent oligopeptide transport family protein     | 2.06                          | 130.80     | 0.56                          | 63.54           | 0.02                              | 0.01            | 1.18                              | 158.70         | 0.41                              | 134.60               | 0.95                                   |
| AT1G28190 | expressed protein                                          | 2.05                          | 43.27      | 0.11                          | 21.06           | 0.05                              | 0.00            | 0.92                              | 38.16          | 0.94                              | 41.67                | 0.42                                   |
| AT4G26150 | zinc finger family protein                                 | 2.05                          | 54.91      | 0.09                          | 26.75           | 0.05                              | 0.03            | 1.05                              | 47.27          | 0.26                              | 44.87                | 0.82                                   |
| AT2G29440 | glutathione S-transferase, putative                        | 2.04                          | 79.96      | 0.08                          | 39.24           | 0.02                              | 0.01            | 1.26                              | 84.28          | 0.25                              | 66.72                | 0.37                                   |
| AT5G06400 | expressed protein                                          | 2.03                          | 121.90     | 0.02                          | 59.99           | 0.02                              | 0.01            | 1.00                              | 104.50         | 0.64                              | 104.20               | 0.93                                   |
| AT1G78120 | tetrapeptide repeat-containing protein                     | 2.03                          | 24.53      | 0.74                          | 12.18           | 0.08                              | 0.04            | 1.00                              | 23.92          | 1.00                              | 24.70                | 0.86                                   |
| AT3G11280 | myb family transcription factor                            | 2.01                          | 768.80     | 0.59                          | 382.40          | 0.02                              | 0.01            | 1.03                              | 774.50         | 0.52                              | 754.10               | 0.96                                   |
| AT5G19730 | pectinesterase family protein                              | 1.99                          | 46.39      | 1.00                          | 23.28           | 0.03                              | 0.03            | 0.82                              | 47.17          | 0.97                              | 57.68                | 0.06                                   |
| AT1G63840 | zinc finger family protein                                 | 1.98                          | 119.60     | 0.20                          | 60.31           | 0.03                              | 0.03            | 0.83                              | 103.00         | 0.64                              | 123.40               | 0.16                                   |
| AT4G91720 | WRKY family transcription factor                           | 1.97                          | 66.42      | 0.71                          | 33.65           | 0.03                              | 0.04            | 0.97                              | 72.16          | 0.51                              | 74.23                | 0.18                                   |
| AT5G58660 | zinc finger family protein                                 | 1.95                          | 54.06      | 0.34                          | 27.44           | 0.03                              | 0.04            | 1.00                              | 54.06          | 0.37                              | 51.37                | 0.90                                   |
| AT5G20110 | dynein light chain, putative                               | 1.95                          | 28.92      | 0.63                          | 14.83           | 0.03                              | 0.03            | 0.93                              | 28.82          | 0.64                              | 31.01                | 0.32                                   |
| AT2G39710 | aspartyl protease family protein                           | 1.94                          | 43.19      | 0.24                          | 22.30           | 0.04                              | 0.01            | 1.03                              | 46.02          | 0.44                              | 44.84                | 0.45                                   |
| AT1G26770 | expansin, putative                                         | 1.93                          | 340.00     | 0.97                          | 176.40          | 0.02                              | 0.05            | 0.71                              | 343.90         | 0.97                              | 486.10               | 0.01                                   |
| AT3G22760 | CXC domain containing TSO1-like protein 1                  | 1.92                          | 77.47      | 0.24                          | 40.35           | 0.03                              | 0.03            | 0.91                              | 68.91          | 0.90                              | 75.98                | 0.30                                   |
| AT1G33960 | avirulence-responsive protein / avirulence induced gene    | 1.92                          | 419.10     | 0.18                          | 18.57           | 0.05                              | 0.03            | 1.12                              | 455.63         | 0.49                              | 40.57                | 0.49                                   |
| AT1G21060 | expressed protein                                          | 1.91                          | 52.92      | 0.61                          | 27.67           | 0.03                              | 0.04            | 1.16                              | 57.48          | 0.14                              | 49.64                | 0.78                                   |
| AT5G07240 | calmodulin-binding family protein                          | 1.91                          | 98.73      | 0.06                          | 51.73           | 0.03                              | 0.00            | 0.85                              | 83.99          | 0.62                              | 96.67                | 0.28                                   |
| AT5G57220 | cytochrome P450, putative                                  | 1.91                          | 121.20     | 0.60                          | 63.58           | 0.02                              | 0.00            | 0.77                              | 134.10         | 0.73                              | 173.60               | 0.08                                   |
| AT1G22400 | UDP-galucronosyl/UDP-glucosyl transferase family protein   | 1.89                          | 360.20     | 0.38                          | 190.20          | 0.02                              | 0.02            | 1.33                              | 413.90         | 0.05                              | 311.40               | 0.30                                   |
| AT2G02719 | PRC1-like-containing protein                               | 1.89                          | 419.10     | 0.10                          | 216.90          | 0.02                              | 0.02            | 1.29                              | 393.80         | 0.13                              | 305.20               | 0.22                                   |
| AT4G33050 | calmodulin-binding family protein                          | 1.89                          | 225.30     | 0.57                          | 119.10          | 0.02                              | 0.02            | 0.80                              | 263.10         | 0.16                              | 270.50               | 0.39                                   |
| AT4G00480 | myc-related transcription factor                           | 1.87                          | 68.34      | 0.81                          | 36.46           | 0.02                              | 0.03            | 1.02                              | 72.30          | 0.47                              | 70.55                | 0.81                                   |
| AT5G50130 | short-chain dehydrogenase/reductase family protein         | 1.86                          | 111.40     | 0.01                          | 59.88           | 0.04                              | 0.02            | 1.34                              | 105.60         | 0.11                              | 78.84                | 0.13                                   |
| AT5G20820 | auxin-responsive protein-related                           | 1.85                          | 90.84      | 0.26                          | 49.12           | 0.03                              | 0.02            | 1.06                              | 88.44          | 0.33                              | 83.14                | 0.96                                   |
| AT1G63080 | F-box family protein / SKP1 interacting partner 3-related  | 1.85                          | 139.60     | 0.29                          | 75.05           | 0.02                              | 0.01            | 1.02                              | 139.60         | 0.29                              | 137.40               | 0.86                                   |
| AT5G06790 | expressed protein                                          | 1.84                          | 12.62      | 0.58                          | 6.84            | 0.27                              | 0               |                                   |                |                                   |                      |                                        |

|           |                                                           |      |        |      |        |      |      |      |        |      |        |      |
|-----------|-----------------------------------------------------------|------|--------|------|--------|------|------|------|--------|------|--------|------|
| AT5G53420 | expressed protein                                         | 1,83 | 141,70 | 0,49 | 77,42  | 0,02 | 0,01 | 1,02 | 190,80 | 0,03 | 187,20 | 0,43 |
| AT4G36220 | cytochrome P450 8A1 / ferulate-5-hydroxylase              | 1,83 | 115,50 | 0,81 | 63,18  | 0,02 | 0,01 | 1,09 | 132,00 | 0,18 | 121,10 | 1,00 |
| AT5G48660 | phototropic-responsive NPH3 family protein                | 1,83 | 25,09  | 0,66 | 13,73  | 0,09 | 0,01 | 0,92 | 24,00  | 0,92 | 26,12  | 0,67 |
| AT1G56610 | transcription activator NAC1                              | 1,83 | 67,20  | 0,71 | 36,82  | 0,02 | 0,01 | 1,12 | 83,67  | 0,15 | 74,84  | 0,47 |
| AT5G53210 | basic helix-loop-helix family protein                     | 1,82 | 43,54  | 0,48 | 23,96  | 0,05 | 0,01 | 1,09 | 45,70  | 0,33 | 41,97  | 0,92 |
| AT1G58440 | squalene monooxygenase, putative / squalene epoxidase, p  | 1,81 | 185,80 | 0,50 | 102,40 | 0,02 | 0,01 | 1,00 | 196,60 | 0,55 | 197,50 | 0,67 |
| AT5G42750 | expressed protein                                         | 1,81 | 34,29  | 0,43 | 18,91  | 0,06 | 0,04 | 0,91 | 31,46  | 0,84 | 34,67  | 0,55 |
| AT2G26170 | thromboxane-A synthase, putative / cytochrome P450 family | 1,81 | 130,00 | 0,35 | 71,87  | 0,03 | 0,03 | 1,10 | 129,30 | 0,51 | 117,30 | 0,92 |
| AT4G31330 | expressed protein                                         | 1,81 | 31,49  | 0,37 | 17,41  | 0,04 | 0,04 | 1,05 | 45,13  | 0,09 | 43,01  | 0,33 |
| AT5G67520 | adenylsulfate kinase, putative                            | 1,81 | 19,96  | 0,62 | 11,04  | 0,13 | 0,01 | 0,97 | 20,36  | 0,74 | 21,04  | 0,54 |
| AT2G05940 | protein kinase, putative                                  | 1,80 | 129,60 | 0,61 | 71,86  | 0,02 | 0,02 | 0,86 | 131,20 | 0,70 | 151,70 | 0,14 |
| AT1G21820 | unknown protein EST gb AA586241 comes from this gene      | 1,80 | 267,40 | 0,01 | 148,80 | 0,06 | 0,01 | 1,05 | 221,10 | 0,56 | 210,10 | 0,65 |
| AT1G23090 | sulfate transporter, putative                             | 1,79 | 168,50 | 0,00 | 94,10  | 0,09 | 0,01 | 1,28 | 140,00 | 0,09 | 109,30 | 0,21 |
| AT1G56650 | myb family transcription factor                           | 1,79 | 13,40  | 0,71 | 7,49   | 0,24 | 0,02 | 1,02 | 15,51  | 0,37 | 15,25  | 0,44 |
| AT3G22104 | phototropic-responsive NPH3 protein-related               | 1,78 | 54,04  | 0,74 | 30,28  | 0,03 | 0,04 | 0,92 | 57,90  | 0,69 | 62,77  | 0,50 |
| AT3G50240 | kinesin motor protein-related                             | 1,78 | 104,90 | 0,26 | 58,80  | 0,02 | 0,02 | 0,91 | 96,03  | 0,61 | 105,80 | 0,52 |
| AT3G63210 | expressed protein                                         | 1,78 | 42,25  | 0,59 | 23,70  | 0,05 | 0,04 | 0,99 | 43,89  | 0,46 | 44,39  | 0,65 |
| AT3G19200 | hypothetical protein                                      | 1,78 | 65,39  | 0,44 | 36,74  | 0,03 | 0,03 | 0,97 | 64,99  | 0,71 | 66,71  | 0,57 |
| AT1G20650 | protein kinase family protein                             | 1,78 | 173,60 | 0,34 | 97,55  | 0,02 | 0,01 | 0,91 | 172,50 | 0,74 | 189,00 | 0,18 |
| AT3G46670 | UDP-glucuronosyl/UDP-glucosyl transferase family protein  | 1,77 | 64,03  | 0,74 | 36,10  | 0,02 | 0,04 | 0,75 | 62,85  | 0,64 | 84,04  | 0,04 |
| AT5G47220 | ethylene-responsive element-binding factor 2              | 1,77 | 73,38  | 0,09 | 41,41  | 0,04 | 0,01 | 1,41 | 88,29  | 0,40 | 62,73  | 0,44 |
| AT3G26960 | expressed protein                                         | 1,76 | 45,92  | 0,73 | 26,05  | 0,04 | 0,00 | 0,89 | 45,30  | 0,98 | 50,70  | 0,29 |
| AT5G39220 | hydrolase, alpha/beta fold family protein                 | 1,76 | 15,18  | 0,65 | 8,62   | 0,23 | 0,04 | 0,88 | 13,45  | 0,93 | 15,35  | 0,66 |
| AT2G41180 | sigA-binding protein-related                              | 1,76 | 61,74  | 0,85 | 35,11  | 0,03 | 0,02 | 0,92 | 65,18  | 0,52 | 70,87  | 0,15 |
| AT5G62470 | myb family transcription factor                           | 1,75 | 31,13  | 0,34 | 17,76  | 0,09 | 0,02 | 1,20 | 33,42  | 0,39 | 27,81  | 0,76 |
| AT5G06530 | ABC transporter family protein                            | 1,74 | 180,40 | 0,33 | 103,70 | 0,02 | 0,04 | 1,10 | 206,60 | 0,38 | 188,30 | 0,66 |
| AT5G61520 | hexose transporter, putative                              | 1,73 | 145,00 | 0,59 | 83,70  | 0,02 | 0,04 | 1,13 | 166,00 | 0,06 | 146,30 | 0,99 |

| AGI Code  | Protein function                                              | Fold induction in <i>gaf1</i> | <i>gaf1</i> | t-test p-value ( <i>gaf1</i> ) | <i>gaf1</i> + GA | t-test p-value ( <i>gaf1</i> + GA) | p-value (ANOVA) | Fold induction in <i>gid1a-c</i> | <i>gid1a-c</i> | t-test p-value ( <i>gid1a-c</i> ) | <i>gid1a-c</i> + GA3 | st p-value ( <i>gid1a-c</i> + GA3) |
|-----------|---------------------------------------------------------------|-------------------------------|-------------|--------------------------------|------------------|------------------------------------|-----------------|----------------------------------|----------------|-----------------------------------|----------------------|------------------------------------|
| AT1G14920 | GAI                                                           | 2.51                          | 69.80       | 0.36                           | 175.40           | 0.00                               | 0.01            | 1.14                             | 74.78          | 0.81                              | 65.61                | 0.23                               |
| AT5G20790 | expressed protein                                             | 2.50                          | 32.88       | 0.05                           | 82.35            | 0.11                               | 0.05            | 1.37                             | 57.30          | 0.91                              | 41.87                | 0.54                               |
| AT3G58120 | bZIP transcription factor family protein                      | 2.50                          | 46.28       | 0.46                           | 115.50           | 0.01                               | 0.01            | 1.21                             | 48.87          | 0.72                              | 40.50                | 0.09                               |
| AT1G78170 | expressed protein                                             | 2.39                          | 76.03       | 0.26                           | 181.40           | 0.01                               | 0.01            | 0.97                             | 74.66          | 0.38                              | 76.59                | 0.30                               |
| AT2G45680 | TCP family transcription factor                               | 2.38                          | 24.29       | 0.70                           | 57.86            | 0.00                               | 0.02            | 0.91                             | 23.19          | 0.47                              | 25.47                | 0.82                               |
| AT2G18300 | basic helix-loop-helix family protein                         | 2.16                          | 110.90      | 0.68                           | 239.30           | 0.01                               | 0.02            | 1.15                             | 104.30         | 0.54                              | 90.55                | 0.16                               |
| AT5G15580 | expressed protein                                             | 2.09                          | 31.83       | 0.67                           | 66.58            | 0.00                               | 0.01            | 1.02                             | 32.68          | 0.79                              | 32.06                | 0.58                               |
| AT5G65300 | expressed protein                                             | 2.08                          | 23.78       | 0.77                           | 49.41            | 0.00                               | 0.02            | 1.20                             | 23.71          | 0.67                              | 19.76                | 0.20                               |
| AT1G57560 | myb family transcription factor                               | 2.04                          | 7.50        | 0.44                           | 15.32            | 0.12                               | 0.04            | 0.94                             | 7.36           | 0.42                              | 7.83                 | 0.48                               |
| AT1G76620 | expressed protein                                             | 2.02                          | 7.82        | 0.49                           | 15.80            | 0.07                               | 0.02            | 0.93                             | 8.49           | 0.60                              | 9.11                 | 0.70                               |
| AT3G28910 | myb family transcription factor                               | 1.99                          | 38.11       | 0.12                           | 75.67            | 0.00                               | 0.00            | 0.85                             | 43.10          | 0.45                              | 50.93                | 0.40                               |
| AT2G41940 | zinc finger family protein                                    | 1.97                          | 69.34       | 0.63                           | 136.90           | 0.02                               | 0.02            | 0.99                             | 71.53          | 0.82                              | 72.10                | 0.71                               |
| AT5G01040 | laccase family protein                                        | 1.96                          | 114.60      | 0.14                           | 224.30           | 0.00                               | 0.03            | 0.76                             | 126.70         | 0.18                              | 166.40               | 0.10                               |
| AT5G40390 | raffinose synthase family protein                             | 1.90                          | 80.12       | 0.23                           | 151.90           | 0.00                               | 0.03            | 0.77                             | 79.18          | 0.12                              | 102.20               | 0.57                               |
| AT1G10460 | zinc finger family protein                                    | 1.88                          | 15.86       | 0.77                           | 23.79            | 0.00                               | 0.04            | 0.92                             | 13.79          | 0.66                              | 15.02                | 0.91                               |
| AT5G54510 | auxin-responsive GH3 protein                                  | 1.86                          | 75.28       | 0.44                           | 140.00           | 0.00                               | 0.02            | 1.32                             | 70.24          | 0.71                              | 53.31                | 0.03                               |
| AT5G08130 | basic helix-loop-helix family protein                         | 1.85                          | 83.82       | 0.35                           | 154.90           | 0.00                               | 0.02            | 1.26                             | 100.90         | 0.50                              | 79.80                | 0.09                               |
| AT1G69530 | expansin, putative                                            | 1.83                          | 368.00      | 0.98                           | 674.60           | 0.02                               | 0.04            | 1.41                             | 358.70         | 0.76                              | 253.60               | 0.01                               |
| AT3G15540 | auxin-responsive AUX/IAA family protein                       | 1.82                          | 36.35       | 0.92                           | 66.30            | 0.01                               | 0.04            | 1.23                             | 37.58          | 0.78                              | 30.51                | 0.17                               |
| AT2G34140 | Dof-type zinc finger domain-containing protein                | 1.81                          | 16.75       | 0.89                           | 30.28            | 0.01                               | 0.01            | 1.08                             | 15.54          | 0.74                              | 14.44                | 0.49                               |
| AT3G07010 | pectate lyase family protein                                  | 1.80                          | 33.54       | 0.80                           | 60.47            | 0.00                               | 0.02            | 1.13                             | 31.03          | 0.56                              | 27.46                | 0.18                               |
| AT4G14550 | auxin-responsive AUX/IAA family protein                       | 1.80                          | 10.24       | 0.88                           | 18.40            | 0.04                               | 0.02            | 1.00                             | 10.36          | 0.87                              | 10.31                | 0.83                               |
| AT3G14560 | expressed protein                                             | 1.78                          | 41.15       | 0.90                           | 73.32            | 0.00                               | 0.03            | 1.13                             | 37.48          | 0.46                              | 33.16                | 0.28                               |
| AT1G19220 | transcriptional factor B3 family protein / auxin-responsive f | 1.78                          | 16.69       | 0.29                           | 29.71            | 0.04                               | 0.02            | 1.15                             | 21.11          | 0.50                              | 18.32                | 0.44                               |
| AT4G32280 | auxin-responsive AUX/IAA family protein                       | 1.77                          | 19.02       | 0.83                           | 33.71            | 0.01                               | 0.04            | 1.42                             | 19.27          | 0.89                              | 13.58                | 0.16                               |
| AT1G10120 | basic helix-loop-helix family protein                         | 1.76                          | 56.25       | 0.33                           | 99.09            | 0.00                               | 0.02            | 0.96                             | 55.56          | 0.50                              | 57.59                | 0.32                               |
| AT1G07090 | expressed protein                                             | 1.75                          | 93.09       | 0.31                           | 163.90           | 0.00                               | 0.04            | 1.18                             | 109.90         | 0.86                              | 93.02                | 0.08                               |
| AT5G56670 | beta-galactosidase, putative / lactase, putative              | 1.75                          | 199.60      | 0.44                           | 349.60           | 0.00                               | 0.01            | 1.24                             | 149.30         | 0.22                              | 120.60               | 0.01                               |

**Supplemental Table 1.** List of genes that are repressed or induced by 100  $\mu$ M GA3 treatment (1 hour) in a *ga1* allele (SALK\_109115, Columbia ecotype) and their expression in the *gid1a-c* triple mutant. Genes are ordered by fold repression or induction. Criteria for this gene list were a minimum raw expression level of 50 (noise level of expression cutoff), a 1.75 fold expression change between the untreated and the GA3 treated sample, and a p-value < 0.05 in a one-way ANOVA test combined with a Benjamini and Hochberg false discovery rate mean expression level correction. The first work sheet shows GA3 repressed genes, the second work sheet shows GA3 induced genes. The tables provide the following information: AGI Code; Protein function; Fold Repression or Induction of *ga1* (ratio of the mean expression levels of treated versus untreated *ga1* samples); *ga1* (mean of three biological replicates, raw data); t-test p-value (*ga1*), (t-test p-value of three biological replicates of the untreated *ga1* samples); *ga1* + GA (mean of three biological replicates, raw data); t-test p-value (*ga1* + GA), (t-test p-value of three biological replicates of the treated *ga1* samples); p-value (ANOVA) (p-value in a one-way ANOVA test of the *ga1* samples combined with a Benjamini and Hochberg false discovery rate mean expression level correction); Fold Repression or Induction of *gid1a-c* samples (Ratio of mean expression level of treated versus untreated *gid1a-c* samples); *gid1a-c* (mean of three biological replicates, raw data); t-test p-value (*gid1a-c*), (t-test p-value of three biological replicates of the untreated *gid1a-c* samples); *gid1a-c* + GA (mean of three biological replicates, raw data); t-test p-value (*gid1a-c* + GA), (t-test p-value of three biological replicates of the GA3 treated *gid1a-c* samples).
